# Supplementary material for: The first map of crop sequence types in Europe over 2012–2018
Source: Copernicus journal article supplement (doi:10.5194/essd-15-5651-2023), 2023-12-13
Supplement: Supplementary file 1 [file essd-15-5651-2023-supplement.pdf]

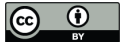

*Supplement of*

## **The first map of crop sequence types in Europe over 2012–2018**

**Rémy Ballot et al.**

*Correspondence to:* Rémy Ballot ([remy.ballot@inrae.fr](mailto:remy.ballot@inrae.fr))

The copyright of individual parts of the supplement might differ from the article licence.

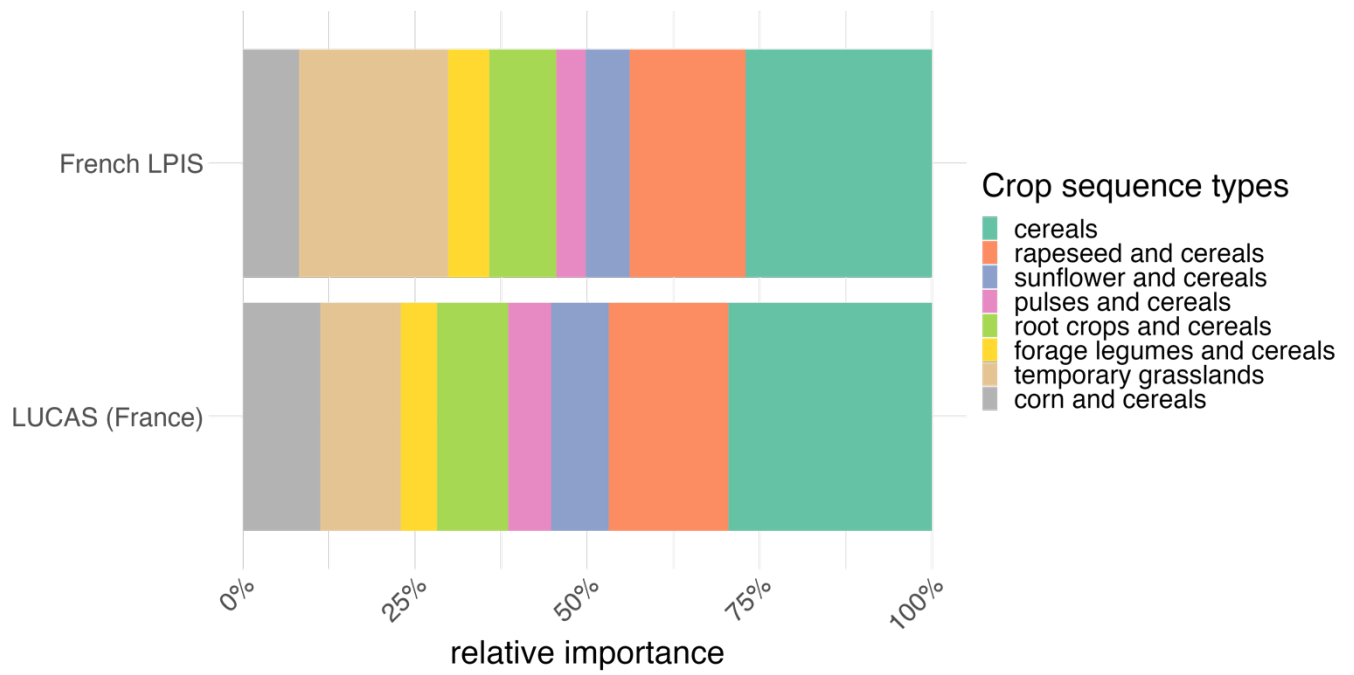

**Figure S1. Comparison of the relative importance of crop sequence types derived from the LUCAS and French LPIS datasets at the national scale in France**

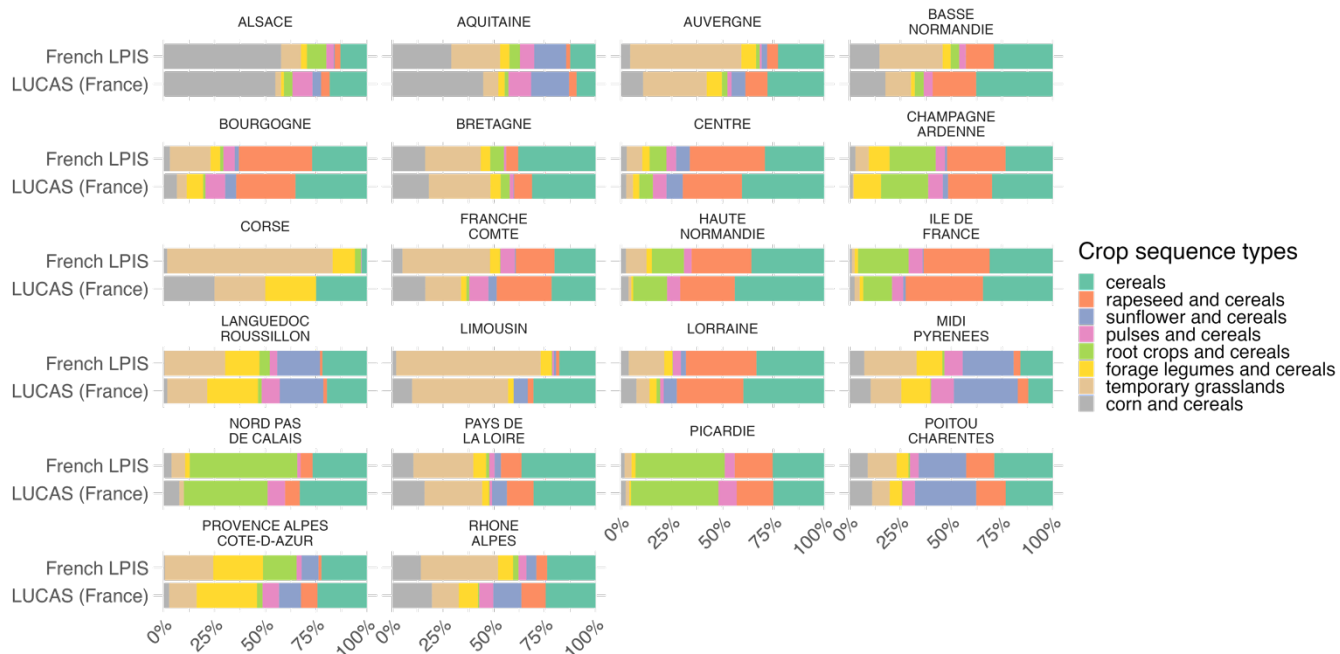

5

**Figure S2. Comparison of the relative importance of crop sequence types derived from the LUCAS and French LPIS datasets for each of the 22 regions in France**

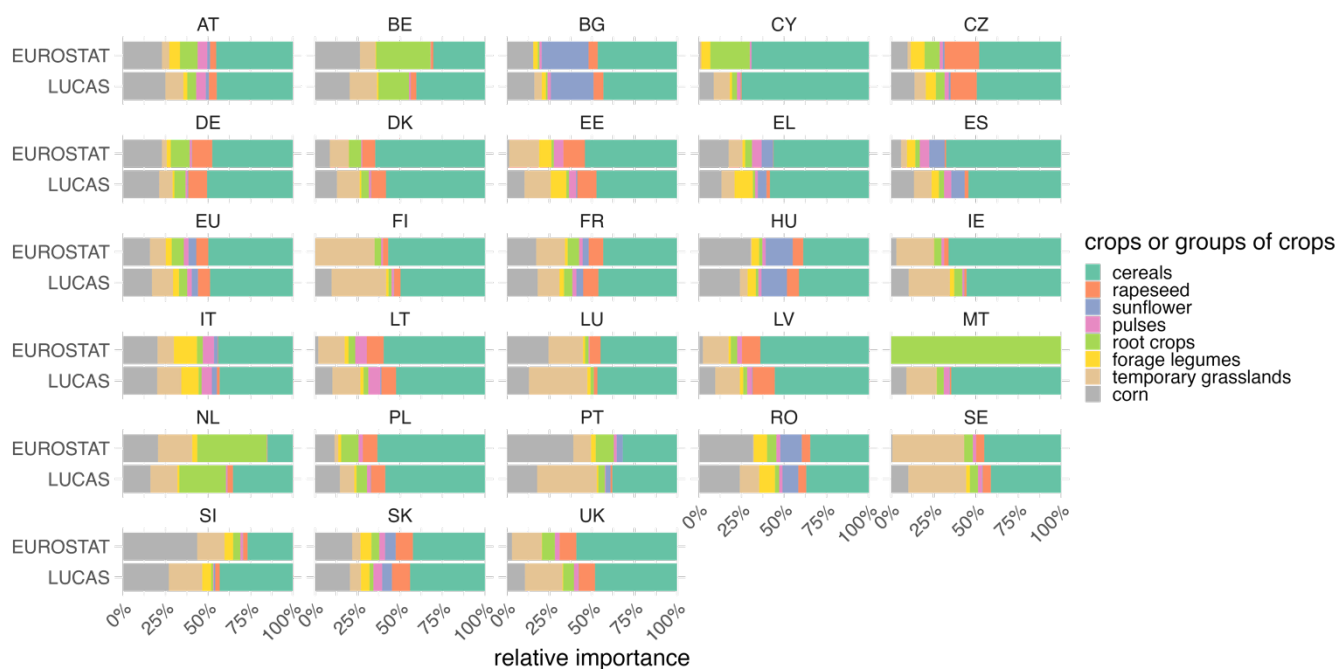

10 **Figure S3. Comparison of the relative importance of crops / groups of crops in arable land, derived from crop sequence types relative importance and characteristics from LUCAS dataset or land use from EUROSTAT dataset for each country in Europe (AT: Austria, BE: Belgium, BG: Bulgaria, CY: Cyprus, CZ: Czech republic, DE: Germany, DK: Denmark, EE: Estonia, EL: Greece, ES: Spain, EU: Europe, FI: Finland, FR: France, HU: Hungary . IE: Ireland, IT: Italy, LT: Lithuania, LU: Luxembourg, LV: Latvia, MT: Montenegro, NL: The Netherlands, PL: Poland, PT: Portugal, RO: Romania, SE: Sweden, SI: Slovenia, SK: Slovakia, UK: United Kingdom)**
